# Supplementary material
Source: publisher figshare collection journal article supplement (https://f1000.figshare.com/articles/dataset/_/1566801)

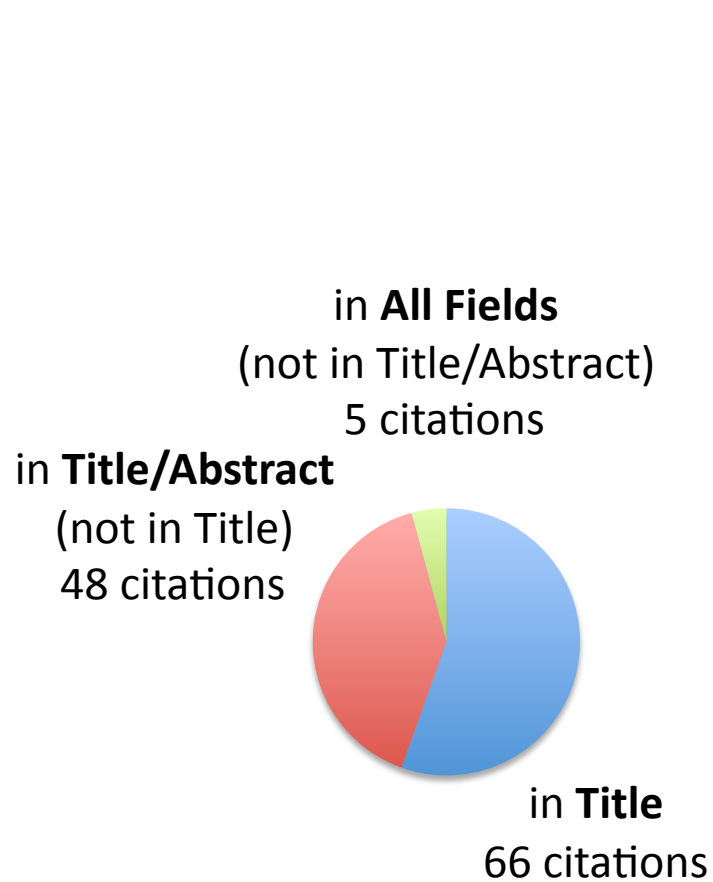

Ebola/Ebolavirus  
in **All Fields**  
119 citations  
in 2013

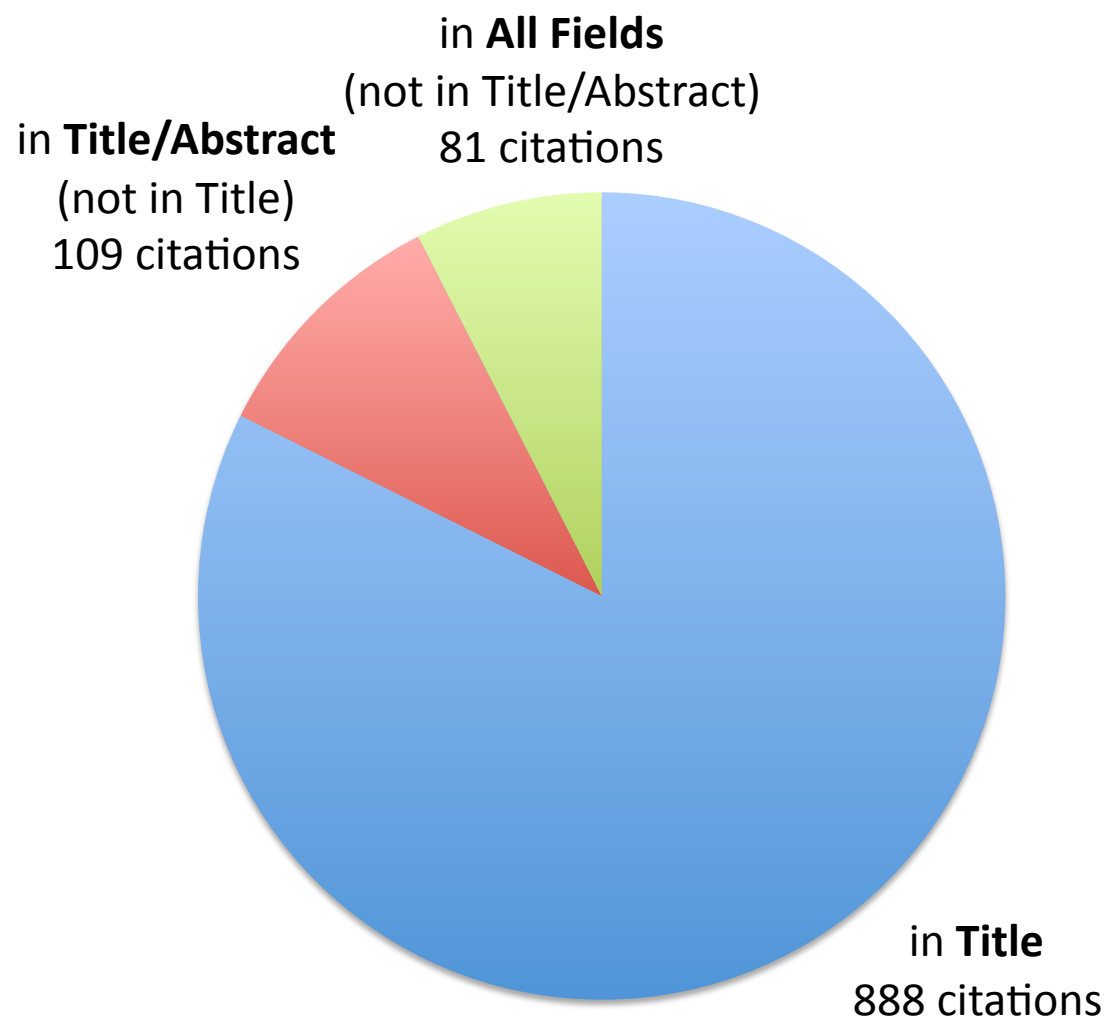

Ebola/Ebolavirus  
in **All Fields**  
1078 citations  
in 2014

Fig. 37

Supplement: Supplementary file 1 [file 1]
